# Supplementary material
Source: PubMed Central journal article supplement (PMC3078413)
Supplement: 1013850108_pnas.201013850SI.pdf [file 1013850108_pnas.201013850SI.pdf]

# Supporting Information

Protas et al. 10.1073/pnas.1013850108

## SI Materials and Methods

**Degenerate PCR.** Degenerate primers were designed by using alignments of *Drosophila melanogaster*, *Tribolium castaneum*, *Apis mellifera*, and *Daphnia pulex* sequences. Degenerate PCR was performed by using the following protocol: 94 °C for 3 min, 35 cycles of 94 °C for 30 s, 50 °C for 30 s, 72 °C for 1 min, and finally 72 °C for 10 min, and then chilled to 4 °C (the red primers in Dataset S1). Some degenerate primers used were designed by using the primer design program CODEHOP (<http://blocks.fhcr.org/codehop.html>) and an annealing temperature of 60 °C (the blue primers in Dataset S1). The first PCR was performed with the forward and reverse primer. A second PCR was performed by adding 1  $\mu$ L of the first PCR as template and either the same two primers or nested primers (if listed in Dataset S1). Previously published primers were used to amplify the *Asellus aquaticus* ortholog of *hedgehog* (1). The gene-associated markers not listed in Dataset S1 were isolated from gene-specific sequences generated by Floragenex (see below) or were amplified by incorrect priming of degenerate primers.

**Floragenex Generated SNPs by Using RAD LongRead Technology.** Genomic DNA was purified from thorax tissue by using the QIAamp DNA micro kit (Qiagen). Ten micrograms of DNA from a cave individual, a surface individual, and a hybrid individual were digested with the restriction endonuclease SbfI, and RAD tag libraries were produced (2). RAD tag libraries were sequenced by using paired end (2  $\times$  60 bp) sequencing chemistry and an Illumina Genome Analyzer IIx at the University of Oregon High Throughput Sequencing Facility in Eugene, OR. Similar to pub-

lished methods of genome assembly using short-read Illumina/Solexa data (3), the RAD LongRead method allows for the assembly of DNA sequences flanking restriction enzyme sites. Sequence data were categorized by “barcode” and was assembled into a reference for SNP detection. Poor sequences, with a converted phred score of Q10 or lower, were eliminated and remaining sequences were compiled into RAD sequence clusters, identical at the single end Illumina read. Sequences with a minimum of 20 $\times$  and a maximum of 400 $\times$  sequence coverage at the RAD single end reads were used. The variable paired end sequences were assembled by the Velvet sequence assembler into contigs (4). Floragenex software using the Needleman–Wunsch algorithm aligned raw paired-end sequence reads to the “reference” contig sequences from the cave thorax sample. Raw paired end reads from the cave, surface, and hybrid samples were then aligned with the reference cave thorax contig set; SNPs were called where the cave and surface sequences differed and the hybrid sequence contained both alleles.

**Bias.** We calculated the odds ratio for each binary trait (Tables S3 and S4). We added 0.5 to each value (Table S3) to address the issue of having zero values in the denominator. For the one quantitative trait examined, eye size, we used multiple imputation in R/qtl, which calculated the phenotypic variance responsible. Regarding the Noor effect, we used a Z-test to investigate whether the marker density flanking the areas of the genome containing the large effect loci was different from the average marker density across the genome (Table S4).

1. Vargas-Vila MA, Hannibal RL, Parchem RJ, Liu PZ, Patel NH (2010) A prominent requirement for single-minded and the ventral midline in patterning the dorsoventral axis of the crustacean *Parhyale hawaiiensis*. *Development* 137:3469–3476.
2. Baird NA, et al. (2008) Rapid SNP discovery and genetic mapping using sequenced RAD markers. *PLoS ONE* 3:e3376.

3. Hiatt JB, Patwardhan RP, Turner EH, Lee C, Shendure J (2010) Parallel, tag-directed assembly of locally derived short sequence reads. *Nat Methods* 7:119–122.
4. Zerbino DR, Birney E (2008) Velvet: Algorithms for de novo short read assembly using de Bruijn graphs. *Genome Res* 18:821–829.

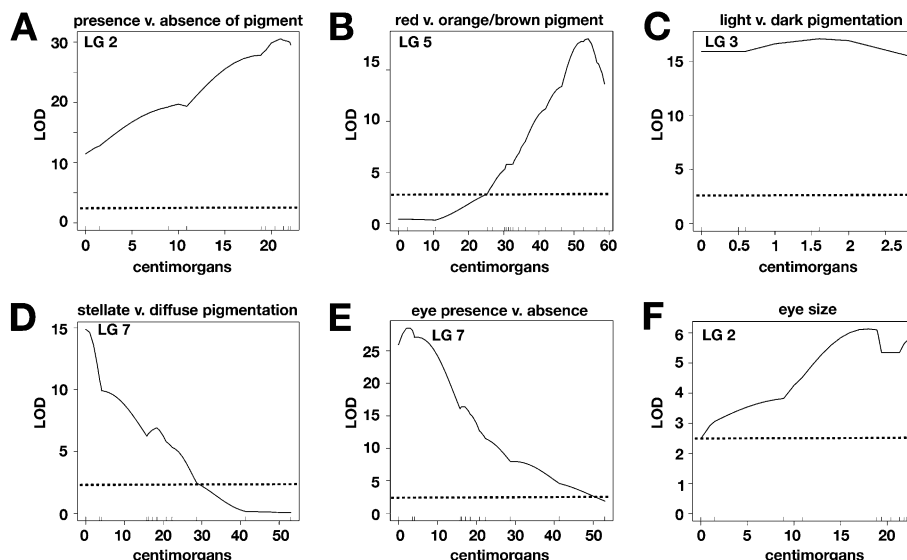

**Fig. S1.** Loci/QTL responsible for eye and pigmentation traits. Using the nonparametric interval mapping method in R/qtl, the following significant loci and QTL were found. (A) Presence vs. absence of pigment. (B) Red vs. orange/brown pigment. (C) Light vs. dark pigment. (D) Stellate vs. diffuse pigment. (E) Eye presence vs. absence. (F) Eye size. Dotted lines show the genome-wide significance levels ( $\alpha < 0.05$ ) by permutation test, LOD = 2.32.

**Table S1. Backcross populations**

| Backcross no. | Female | Male | No. of progeny | No. of broods |
|---------------|--------|------|----------------|---------------|
| 1             | V      | W'   | 5              | 1             |
| 2             | W      | W'   | 20             | 1             |
| 3             | V      | X'   | 19             | 1             |
| 4             | X      | X'   | 7              | 1             |
| 5             | Y      | Y'   | 92             | 4             |
| 6             | Z      | Y'   | 32             | 3             |
| 7             | W      | Z'   | 19             | 1             |

We used seven backcross families generated by five different females (named V, W, X, Y, and Z) and four different males (named W', X', Y', and Z'). The number of progeny per backcross family ranged from 5 to 92 individuals. Two of the families were composed of multiple broods where the same cave male and female mated and produced offspring multiple times.

**Table S2. Gene-specific markers in *Asellus aquaticus***

| Marker name | Likely gene     | BLAST ID       | Species                           | Gene name                                            | Coverage, % | e value  |
|-------------|-----------------|----------------|-----------------------------------|------------------------------------------------------|-------------|----------|
| aa1         | bmp10           | XM_002196574.1 | <i>Taeniopygia guttata</i>        | bone morphogenetic protein 10                        | 96          | 8.00e-11 |
| aa2         | egfr            | XM_002411848.1 | <i>Ixodes scapularis</i>          | epidermal growth factor receptor                     | 54          | 4.00e-34 |
| aa3         | disconnected    | NM_078638.2    | <i>Drosophila melanogaster</i>    | disconnected                                         | 45          | 1.00e-12 |
| aa4         | dachsund        | XM_002427823.1 | <i>Pediculus humanus corporis</i> | dachshund                                            | 25          | 2.00e-09 |
| aa5         | pointed         | XM_002429051.1 | <i>Pediculus humanus corporis</i> | c-ets-1-B                                            | 39          | 3.00e-13 |
| aa6         | hedgehog        | AB125742.1     | <i>Achaearanea tepidariorum</i>   | hedgehog                                             | 73          | 1.00e-19 |
| aa7         | sineoculis      | XM_001096585.2 | <i>Macaca mulatta</i>             | six homeobox 1                                       | 80          | 6.00e-69 |
| aa8         | singed          | XM_002423695.1 | <i>Pediculus humanus corporis</i> | singed                                               | 51          | 3.00e-12 |
| aa9         | barh1           | XM_001861865.1 | <i>Culex quinquefasciatus</i>     | homeobox protein b                                   | 22          | 1.00e-05 |
| aa10        | rap             | XM_623288.2    | <i>Apis mellifera</i>             | retina aberrant in pattern                           | 34          | 3.00e-23 |
| aa11        | sox14           | FJ613627.1     | <i>Scylla paramamosain</i>        | sox14                                                | 45          | 5.00e-36 |
| aa12        | h15             | AM404112.1     | <i>Tegenaria atrica</i>           | h15-3                                                | 93          | 4.00e-24 |
| aa13        | cinnabar        | DQ106550.1     | <i>Limbodessus pinnaclesensis</i> | cinnabar                                             | 13          | 3.90e-02 |
| aa14        | vsx             | U19995.1       | <i>Caenorhabditis elegans</i>     | ceh-10                                               | 57          | 2.00e-27 |
| aa15        | punch           | GU953222.1     | <i>Biston betularia</i>           | GTP cyclohydrolase I                                 | 29          | 1.00e-04 |
| aa16        | schizo          | XM_002422978.1 | <i>Tribolium castaneum</i>        | guanyl-nucleotide exchange factor                    | 78          | 6.00e-32 |
| aa17        | scarlet         | XM_001848914.1 | <i>Culex quinquefasciatus</i>     | scarlet                                              | 69          | 2.00e-12 |
| aa18        | white1          | AF442747.1     | <i>Tribolium castaneum</i>        | white                                                | 67          | 3.00e-05 |
| aa19        | rotund          | NM_001144549.1 | <i>Drosophila melanogaster</i>    | rotund                                               | 98          | 4.00e-37 |
| aa20        | neprilysin      | XM_002408091.1 | <i>Ixodes scapularis</i>          | neprilysin                                           | 64          | 6.00e-28 |
| aa21        | coracle         | XM_001943191.1 | <i>Acyrtosiphon pisum</i>         | coracle                                              | 18          | 7.00e-18 |
| aa22        | tfp             | DQ848565.1     | <i>Locusta migratoria</i>         | tfp1                                                 | 57          | 2.00e-14 |
| aa23        | karmoisin       | XM_001857512.1 | <i>Culex quinquefasciatus</i>     | monocarboxylate transporter                          | 37          | 4.00e-16 |
| aa24        | tensin          | XM_001602507.1 | <i>Nasonia vitripennis</i>        | tensin                                               | 49          | 7.00e-34 |
| aa25        | pbx             | XM_001120618.1 | <i>Apis mellifera</i>             | pbx/knotted 1 homeobox 1.1                           | 57          | 4.00e-19 |
| aa26        | tramtrack       | NM_001164138.1 | <i>Tribolium castaneum</i>        | tramtrack                                            | 30          | 6.00e-12 |
| aa27        | labial          | NM_001114290.1 | <i>Tribolium castaneum</i>        | labial                                               | 22          | 7.00e-07 |
| aa28        | nanos           | EU289288.1     | <i>Parhyale hawaiiensis</i>       | nanos                                                | 62          | 6.00e-05 |
| aa29        | msx             | AB302960.1     | <i>Pandinus imperator</i>         | msxA                                                 | 38          | 5.00e-09 |
| aa30        | tef-1           | XM_002187355.1 | <i>Taeniopygia guttata</i>        | tef-1 gamma                                          | 69          | 7.00e-44 |
| aa31        | myosin          | AF474966.1     | <i>Glyptonotus antarcticus</i>    | myosin                                               | 32          | 8.00e-27 |
| aa32        | tiptop          | XM_002422528.1 | <i>Pediculus humanus corporis</i> | tiptop                                               | 50          | 4.00e-18 |
| aa33        | ptcr            | EF442429.1     | <i>Apis mellifera</i>             | patched-related protein                              | 64          | 1.00e-24 |
| aa34        | plexin          | XM_001661601.1 | <i>Aedes aegypti</i>              | plexin b                                             | 77          | 2.00e-73 |
| aa35        | none            | n.a.           | n.a.                              | n.a.                                                 | n.a.        | n.a.     |
| aa36        | scorched        | XM_969086.2    | <i>Tribolium castaneum</i>        | F-actin-capping protein subunit alpha                | 20          | 5.00e-08 |
| aa37        | pipsqueak       | XM_965219.2    | <i>Tribolium castaneum</i>        | bmp-induced factor                                   | 52          | 2.00e-13 |
| aa38        | vermillion      | NM_078558.2    | <i>Drosophila melanogaster</i>    | vermillion                                           | 49          | 1.00e-15 |
| aa39        | fringe          | XM_002128597.1 | <i>Ciona intestinalis</i>         | fringe                                               | 38          | 2.00e-07 |
| aa40        | echinus         | XM_969086.2    | <i>Tribolium castaneum</i>        | F-actin-capping protein subunit alpha                | 20          | 2.00e-07 |
| aa41        | opa             | XM_623410.2    | <i>Apis mellifera</i>             | optic atrophy 1-like                                 | 63          | 9.00e-17 |
| aa42        | catsup          | XM_395560.3    | <i>Apis mellifera</i>             | solute casolute carrier family 39 (zinc transporter) | 20          | 1.00e-06 |
| aa43        | AP-1            | XR_015060.1    | <i>Apis mellifera</i>             | AP-1                                                 | 67          | 9.00e-28 |
| aa44        | no ocelli       | XM_969829.2    | <i>Tribolium castaneum</i>        | nocA no ocelli                                       | 44          | 1.00e-29 |
| aa45        | cytochrome P450 | NM_001130436.1 | <i>Tribolium castaneum</i>        | cytochrome P450                                      | 64          | 1.00e-10 |
| aa46        | abrupt          | XM_002424613.1 | <i>Pediculus humanus corporis</i> | abrupt                                               | 10          | 6.00e-07 |
| aa47        | kekkon          | XM_002431457.1 | <i>Pediculus humanus corporis</i> | leucine-rich repeat-containing protein 24 precursor  | 83          | 2.00e-22 |
| aa48        | net             | XM_962827.1    | <i>Tribolium castaneum</i>        | net                                                  | 20          | 2.00e-05 |

Table S2. Cont.

| Marker name | Likely gene       | BLAST ID       | Species                           | Gene name                                         | Coverage, % | e value  |
|-------------|-------------------|----------------|-----------------------------------|---------------------------------------------------|-------------|----------|
| aa49        | dll               | NM_001131037.1 | <i>Apis mellifera</i>             | distal-less                                       | 27          | 1.00e-32 |
| aa50        | nckx30            | XM_396230.2    | <i>Apis mellifera</i>             | sodium/potassium/calcium exchanger Nckx30C        | 27          | 2.00e-27 |
| aa51        | amos              | XM_001121050.1 | <i>Apis mellifera</i>             | absent MD neurons and olfactory sensilla          | 16          | 6.00e-03 |
| aa52        | rhomboid          | XM_001122653.1 | <i>Apis mellifera</i>             | stem cell tumor                                   | 29          | 4.00e-09 |
| aa53        | calcitonin        | XM_001653601.1 | <i>Aedes aegypti</i>              | calcitonin receptor                               | 45          | 9.00e-04 |
| aa54        | masquerade        | Y11145.2       | <i>Pacifastacus leniusculus</i>   | masquerade-like                                   | 61          | 7.00e-04 |
| aa55        | suH               | AJ717514.1     | <i>Cupiennius salei</i>           | suppressor of hairless                            | 69          | 8.00e-93 |
| aa56        | Dscam             | GQ154653.1     | <i>Litopenaeus vannamei</i>       | down syndrome cell adhesion molecule              | 98          | 3.00e-17 |
| aa57        | eyegone           | NM_001114345.1 | <i>Tribolium castaneum</i>        | eyegone                                           | 18          | 2.00e-29 |
| aa58        | nubbin            | HM063420.1     | <i>Asellus aquaticus</i>          | nubbin                                            | 57          | 2.00e-46 |
| aa59        | sal               | XM_968136.2    | <i>Tribolium castaneum</i>        | spalt-like protein                                | 14          | 7.00e-09 |
| aa60        | ia2               | XM_969473.2    | <i>Tribolium castaneum</i>        | receptor-type tyrosine-protein phosphatase N2     | 47          | 2.00e-51 |
| aa61        | syt1              | NM_001172394.1 | <i>Nasonia vitripennis</i>        | synaptotagmin 1                                   | 98          | 8.00e-06 |
| aa62        | ef-2              | AF240816.1     | <i>Armadillidium vulgare</i>      | elongation factor-2                               | 100         | 7.00e-35 |
| aa63        | GD20337           | XM_002103257.1 | <i>Drosophila simulans</i>        | GD20337                                           | 31          | 3.00e-08 |
| aa64        | fgfr              | XM_965738.2    | <i>Tribolium castaneum</i>        | fibroblast growth factor receptor                 | 76          | 2.00e-21 |
| aa65        | agrin             | XM_001339729.4 | <i>Danio rerio</i>                | EGF-like fibronectin and laminin domains (EGFLAM) | 46          | 5.00e-05 |
| aa66        | stretchin-mlck    | XM_001121724.1 | <i>Apis mellifera</i>             | stretchin-mlck                                    | 68          | 8.00e-29 |
| aa67        | notch             | AB287421.1     | <i>Achaearanea tepidariorum</i>   | notch                                             | 48          | 5.00e-22 |
| aa68        | groucho           | XM_002427207.1 | <i>Pediculus humanus corporis</i> | groucho                                           | 10          | 5.00e-04 |
| aa69        | msp300            | XM_623753.1    | <i>Apis mellifera</i>             | muscle-specific protein 300                       | 56          | 5.00e-22 |
| aa70        | tango             | FJ745381.1     | <i>Chironomus tepperi</i>         | tango                                             | 89          | 6.00e-15 |
| aa71        | carboxylesterase  | EF675186.1     | <i>Bemisia tabaci</i>             | carboxylesterase 2                                | 52          | 3.00e-22 |
| aa72        | dumpy             | XM_001119920.1 | <i>Apis mellifera</i>             | dumpy                                             | 65          | 1.00e-09 |
| aa73        | rhodopsin         | GQ221739.1     | <i>Neogonodactylus oerstedii</i>  | opsin                                             | 98          | 4.00e-33 |
| aa74        | broad             | XM_001602311.1 | <i>Nasonia vitripennis</i>        | broad-complex core-protein                        | 22          | 8.00e-05 |
| aa75        | rosy              | XM_001501646.2 | <i>Equus caballus</i>             | xanthine dehydrogenase/oxidase                    | 63          | 2.00e-33 |
| aa76        | sp                | FN562992.1     | <i>Parhyale hawaiensis</i>        | sp6-9                                             | 69          | 9.00e-42 |
| aa77        | guanylate cyclase | EF988651.1     | <i>Penaeus monodon</i>            | guanylate cyclase                                 | 76          | 9.00e-19 |
| aa78        | optix             | AB239695.1     | <i>Anthopleura japonica</i>       | Six-A                                             | 99          | 9.00e-56 |
| aa79        | none              | n.a.           | n.a.                              | n.a.                                              | n.a.        | n.a.     |
| aa80        | hth               | XM_001951080.1 | <i>Acyrtosiphon pisum</i>         | homothorax                                        | 29          | 2.00e-19 |
| aa81        | pax2              | XM_962948.2    | <i>Tribolium castaneum</i>        | shaven                                            | 45          | 4.00e-31 |
| aa82        | vps33b            | XM_002736163.1 | <i>Saccoglossus kowalevskii</i>   | vacuolar protein sorting-associated protein 33B   | 36          | 1.00e-07 |
| aa83        | eya               | NM_010165.2    | <i>Mus musculus</i>               | eyes absent 2                                     | 36          | 5.70e-02 |
| aa84        | klu               | NM_057714.3    | <i>Drosophila melanogaster</i>    | klumpfuss                                         | 83          | 2.00e-28 |
| aa85        | repo              | DQ263615.1     | <i>Oncopeltus fasciatus</i>       | repo                                              | 14          | 5.00e-05 |
| aa86        | fatfacets*        | AY591387.1     | <i>Macaca fascicularis</i>        | ubiquitin specific peptidase 9                    | 49          | 5.00e-10 |
| aa87        | pale*             | DQ347833.1     | <i>Acanthopagrus schlegelii</i>   | tyrosine hydroxylase                              | 38          | 1.00e-11 |
| aa88        | pax6*             | AL929172.6     | <i>Danio rerio</i>                | pax6a                                             | 20          | 2.00e-13 |
| aa89        | ash*              | DQ489559.1     | <i>Panulirus argus</i>            | achaete-scute complex protein                     | 40          | 3.00e-16 |
| aa90        | burgundy*         | XM_001604219.1 | <i>Nasonia vitripennis</i>        | gmp synthase                                      | 13          | 1.00e-12 |
| aa91        | lightoid*         | XM_001599094.1 | <i>Nasonia vitripennis</i>        | rab-related protein                               | 40          | 5.00e-52 |
| aa92        | lim*              | XM_002106460.1 | <i>Drosophila simulans</i>        | lim1                                              | 33          | 1.00e-24 |
| aa93        | garnet*           | XM_002666259.1 | <i>Danio rerio</i>                | adaptor-related protein complex 3                 | 42          | 2.00e-19 |

Sequences flanking the SNPs used for genotyping were input into BLAST. Listed are the gene ID, species, query coverage, and e value of the highest BLAST hit. Often, the query coverage is low because a large portion of the sequence is intronic. We did not list the highest BLAST hit if the gene ID did not use a gene name. Because we are using often only a small piece of coding sequence and intronic sequence, the highest BLAST hit is suggestive of the identity of the gene but does not confirm the identity. Markers with an asterisk were genotyped by using PCR. n.a., not applicable.

**Table S3. Number of animals heterozygous or homozygous at the peak marker for the five binary traits**

| Trait                   | Absence vs. presence of pigmentation (aa75) |         | Red vs. orange and brown pigmentation (aa45) |               | Light vs. dark pigmentation (aa83) |            | Stellate vs. diffuse pigment pattern (aa48) |         | Eye absence vs. presence (aa92) |      |
|-------------------------|---------------------------------------------|---------|----------------------------------------------|---------------|------------------------------------|------------|---------------------------------------------|---------|---------------------------------|------|
|                         | 0                                           | 1       | 0                                            | 1             | 0                                  | 1          | 0                                           | 1       | 0                               | 1    |
| Binary code             | 0                                           | 1       | 0                                            | 1             | 0                                  | 1          | 0                                           | 1       | 0                               | 1    |
| Corresponding phenotype | No pigment                                  | Pigment | Red                                          | Orange, brown | Light red, orange                  | Red, brown | Stellate                                    | Diffuse | No eyes                         | Eyes |
| Heterozygous            | 12                                          | 90      | 2                                            | 54            | 0                                  | 66         | 0                                           | 44      | 1                               | 81   |
| Homozygous              | 83                                          | 1       | 34                                           | 1             | 21                                 | 2          | 35                                          | 4       | 51                              | 0    |

**Table S4. Trait name, LG (linkage group), marker name, location on the linkage group, LOD score, odds ratio ( $\log_e$  odds ratio) (qualitative traits), percent variance (quantitative traits), and number of flanking markers within 10 cM of each marker**

| Trait                                | LG | Marker | cM    | LOD   | Odds ratio    | % Variance | Flanking markers |
|--------------------------------------|----|--------|-------|-------|---------------|------------|------------------|
| Presence vs. absence of pigmentation | 2  | aa75   | 21.31 | 37.69 | 403, (6.0)    | n.a.       | 9                |
| Red vs. orange/brown pigmentation    | 5  | aa45   | 52.7  | 21.77 | 501.4, (6.2)  | n.a.       | 5                |
| Light vs. dark pigmentation          | 3  | aa83   | 1.6   | 18.28 | 1143.8, (7.0) | n.a.       | 5                |
| Stellate vs. diffuse pigmentation    | 7  | aa48   | 0     | 19.25 | 781, (6.7)    | n.a.       | 3                |
| Eye presence vs. absence             | 7  | aa92   | 3.6   | 35.68 | 5595.8, (8.6) | n.a.       | 3                |
| Eye size                             | 2  | aa56   | 18.9  | 6.35  | n.a.          | 29.69      | 9                |

n.a., not applicable.

**Table S5. Primers used to assay genotypes for markers aa86–aa93**

| Marker | Primers    | Sequence                         |
|--------|------------|----------------------------------|
| aa86   | FATFACETSF | TGCTGGCAAGTTTTCTCTATGGCACT       |
|        | FATFACETSR | CAGAATGCAAATGGATGATGATGA         |
| aa87   | PALEF      | AAGATATTTAAAAGGCGGTCGTAAC        |
|        | PALER      | GGAGGGTAAAACAGTACGTCCTGCAA       |
| aa88   | PAX6F      | CACACCGCTAGTTGGTTAACACCAT        |
|        | PAX6R      | GACGCAAGAAGTACATTAGTATAATTTTCCAG |
| aa89   | ASHF       | GATGTAGTCCACCGCTGCTTCAGA         |
|        | ASHR       | TAAACTTTGCCCAAACAGCAACAA         |
| aa90   | BURGUNDYF  | CAAAAGGGTGATTAGCATGCAGTTGA       |
|        | BURGUNDYR  | TGGTGAACGGTTATAAGAAAACAG         |
| aa91   | LIGHTOIDF  | AGTTCAGGCCAGGTAGCATTGACTTTGG     |
|        | LIGHTOIDR  | GTCTTTATTGCCTTCGCGGAAGCTC        |
| aa92   | LIMF       | TGGTTACTGTTATGCAATTTACCAAG       |
|        | LIMR       | TGATGTGTCTGGTGGGTTTCGGAGT        |
| aa93   | GARNETF    | TGGGTAACCCTGCATTGATATTTTGTG      |
|        | GARNETR    | TCTGTGGGGTCCGTAGTCCGTTTA         |

The associated alleles could not be distinguished via Sequenom analysis, so either allele-specific PCRs were designed (that only amplified the surface allele) or size specific PCRs were designed (where the surface and cave alleles were different sizes).

**Dataset S1. List of degenerate primers used to amplify candidate genes**[Dataset S1 \(XLS\)](#)

Markers not listed are those that were isolated from Floragenex sequences and, therefore, were not degeneratively amplified. Sequences in red are primers for which a 50 °C annealing temperature was used, and sequences in blue are primers for which a 60 °C annealing temperature was used.

## Dataset S2. Sequences of SNPs used for Sequenom and PCR assays

### [Dataset S2 \(XLS\)](#)

Sequences flanking each SNP are listed as well as the primers used for the Sequenom assay. SNPs used for the assays are in brackets. The surface allele is listed first and the cave allele is listed second. Other SNPs present in the sequences are listed as N except where it is a very large insertion and indicated by \*\*. In many of the sequences, there were areas where one of the populations had a deletion or insertion and those are listed as a string of Ns. Some of the sequences might contain additional SNPs not demarcated by an N. Catsup and SuH sequences contain a fragment of the original degenerate PCR and, therefore, might be missing intronic sequences.
